# Supplementary material for: Optical coherence tomography and T cell gene expression analysis in patients with benign multiple sclerosis
Source: PubMed Central journal article supplement — Neural Regen Res. 2017 Aug;12(8):1352–6. doi: 10.4103/1673-5374.213558 (PMC5607832; doi:10.4103/1673-5374.213558), 2017-08
Supplement: NRR-12-1352_Suppl1.pdf [file NRR-12-1352_Suppl1.pdf]

**Additional file:**

**Open peer review report 1 on “Optical coherence tomography and T cell gene expression analysis in patients with benign multiple sclerosis”**

**Reviewer:** Chunjian Huang, National Jewish Health, USA.

**Comments to the author:** In this report, the Authors investigated 3 Benign multiple sclerosis patients. They performed OCT on each patient. However, some of the criteria such as RNFL thickness are only affected mildly. So the Authors sought to determine the T cells gene profile by cDNA microarrays from PBMC of patients and healthy controls. They do find that IL-10 and LIF was up-regulated while IL-6 and NTSR1 was down-regulated in patients comparing with healthy controls. These gene profile may serve as an indication when combined with other clinical measurement. However, in this report, there are only 3 patients involved, so a larger patients recruitment and gene profile detection will be very helpful for the diagnosis of this special disease. Anyway, this report is still a good trial for the diagnosis of Benign multiple sclerosis.
